# Supplementary material for: Nanoscale isoindigo-carriers: self-assembly and tunable properties
Source: publisher site journal article supplement (doi:10.3762/bjnano.8.34), 2017-02-01
Supplement: Additional file 1 [file 2190-4286-8-34-S1.pdf]

## Supporting Information

for

# **Nanoscale isoindigo-carriers: self-assembly and tunable properties**

Tatiana N. Pashirova\*, Andrei V. Bogdanov, Lenar I. Musin, Julia K. Voronina, Irek R. Nizameev, Marsil K. Kadirov, Vladimir F. Mironov, Lucia Ya. Zakharova, Shamil K. Latypov and Oleg G. Sinyashin

Address: A.E. Arbuzov Institute of Organic and Physical Chemistry, Kazan Scientific Center, Russian Academy of Sciences, Arbuzov str. 8, Kazan, 420088, Russian Federation

Email: Tatiana Pashirova\* - tatyana\_pashirova@mail.ru

\*Corresponding author

## **Additional experimental data**

| <b>Contents</b>                                                                                                                                                                                     | <b>Pages</b> |
|-----------------------------------------------------------------------------------------------------------------------------------------------------------------------------------------------------|--------------|
| General remarks                                                                                                                                                                                     | S3           |
| Solution preparation procedure                                                                                                                                                                      | S3           |
| Table S1. The distribution of sizes of <b>2b</b> , <b>2d</b> , <b>2e</b> , <b>2f</b> , <b>2h</b> particles in water                                                                                 | S5           |
| Figure S1. Zeta-potential of <b>2d</b> , <b>2e</b> , <b>2f</b> and <b>2h</b> particles                                                                                                              | S6           |
| Figure S2. Analysis of the size distribution of <b>2d</b> after incubation in phosphate buffer                                                                                                      | S7           |
| Table S2. Analysis of the size distribution (diameter, nm) of <b>2c–g</b> particles                                                                                                                 | S8           |
| Figure S3. Analysis of the size distribution of <b>2c–g</b> particles                                                                                                                               | S9           |
| Figure S4. Analysis of the size distribution of <b>2c–g</b> particles                                                                                                                               | S10          |
| Figure S5. Zeta-potential of <b>2h</b> particles                                                                                                                                                    | S11          |
| Figure S6. Analysis of the size distribution of <b>2g</b> in phosphate buffer /DMF                                                                                                                  | S12          |
| Figure S7. Analysis of the size distribution of <b>2h</b> particles                                                                                                                                 | S13          |
| Figure S8. The histogram of the head fragment surface distribution                                                                                                                                  | S14          |
| Table S3. The packing parameter, <i>P</i>                                                                                                                                                           | S15          |
| Figure S9. Surface tension isotherms of <b>2e</b> , <b>2g</b> , <b>2h</b>                                                                                                                           | S16          |
| Table S4 Cmc and solubilization capacity by the method of solubilization of Sudan I                                                                                                                 | S17          |
| Figure S10. Dependence of the intensity ratio ( <i>I</i> <sub>0</sub> / <i>I</i> ) for pyrene                                                                                                       | S18          |
| Figure S11–S19. Absorption profile of <b>2a</b> , <b>2c–h</b> , <b>3</b> , <b>1g</b> in chloroform                                                                                                  | S19–S21      |
| Figure S20. Absorption profile of <b>1g</b> in ethanol                                                                                                                                              | S22          |
| Figure S21. Absorption profile of <b>1g</b> in DMF                                                                                                                                                  | S23          |
| Table S5. Molar extinction coefficient of <b>1g</b> , <b>2a</b> , <b>2c</b> , <b>2d</b> , <b>2e–h</b> and <b>3</b> .                                                                                | S24          |
| Figure S22. Absorption profile of <b>2a</b> , <b>1g</b> and <b>3</b> in chloroform and water–SDS solutions                                                                                          | S25          |
| Figure S23. Absorption profile of the <b>3</b> in water–micellar solutions                                                                                                                          | S26          |
| Figure S24. Absorbance of the <b>3</b> at $\lambda_{\max} = 300$ nm in water–micellar solutions                                                                                                     | S27          |
| Figure S25. 1D <sup>1</sup> H, <sup>13</sup> C DEPT and <sup>13</sup> C{ <sup>1</sup> H} NMR spectra of <b>3</b>                                                                                    | S28          |
| Figure S26. 2D <sup>1</sup> H, <sup>1</sup> H COSY NMR spectra of <b>3</b>                                                                                                                          | S29          |
| Figure S27. 2D <sup>1</sup> H, <sup>13</sup> C HSQC NMR spectra of <b>3</b>                                                                                                                         | S30          |
| Figure S28. 2D <sup>1</sup> H, <sup>13</sup> C HMBC NMR spectra of <b>3</b>                                                                                                                         | S31          |
| Figure S29. 1D <sup>1</sup> H and <sup>1</sup> H DPGNOE NMR spectra of <b>3</b>                                                                                                                     | S32          |
| Figure S30. 2D <sup>1</sup> H, <sup>15</sup> N HSQC NMR spectra of <b>3</b>                                                                                                                         | S33          |
| Figure S31. 2D <sup>1</sup> H, <sup>15</sup> N HMBC NMR spectra of <b>3</b>                                                                                                                         | S34          |
| Table S6. Calculated (B3LYP/6-31G(d)//B3LYP/6-31G(d)) for <b>3'</b> and experimental for <b>3</b> <sup>13</sup> C and <sup>15</sup> N (in CDCl <sub>3</sub> /DMSO- <i>d</i> <sub>6</sub> (9:1)) CSs | S35–36       |
| Figure S32. Correlations of calculated (B3LYP/6-31G(d)//B3LYP/6-31G(d), for <b>3'</b> ) versus experimental <sup>13</sup> C chemical shifts for <b>3</b>                                            | S37          |
| References                                                                                                                                                                                          | S38          |

## General remarks

All the manipulations were performed in open vessels. NMR experiments were performed with a 500 MHz (500 MHz for  $^1\text{H}$  NMR; 125 MHz for  $^{13}\text{C}$  NMR; 50.7 MHz for  $^{15}\text{N}$  NMR, respectively) spectrometer equipped with a 5 mm diameter gradient direct broad band probehead and a pulsed gradient unit capable of producing magnetic field pulse gradients in the  $z$ -direction of  $53.5 \text{ G}\cdot\text{cm}^{-1}$ . NMR experiments were carried out at 303 K. DPGFNOE were obtained using a Hermite-shaped pulse for selective excitation. Chemical shifts ( $\delta$  in ppm) are referenced to the solvent  $\text{CDCl}_3$  ( $\delta = 7.27$  ppm for  $^1\text{H}$  and 77.0 ppm for  $^{13}\text{C}$  NMR), to external  $\text{CD}_3\text{NO}_2$  (380.2 ppm) for  $^{15}\text{N}$  NMR spectra (conversion factor to  $\text{NH}_3$ :  $-380.2$  ppm).

The quantum chemical calculations were performed using Gaussian 03 software package. Full geometry optimizations have been carried out within the framework of DFT (B3LYP) method using 6-31G(d) basis sets. Chemical shifts (CSs) were calculated by the GIAO method at the same level of theory. All data were referred to TMS ( $^{13}\text{C}$ ) and  $\text{NH}_3$  ( $^{15}\text{N}$ ) chemical shifts, which were calculated under the same conditions. IR spectra were measured with Bruker Vector-22 spectrometer. Melting points were measured with a Stuart digital SMP10 apparatus and uncorrected. Elemental analyses for C, H and N were performed using a EuroVector 2000 CHNS-3 analyzer, Italy.

## Solution preparation procedure

Compounds **2a–h** were dissolved in DMF at 60 °C followed by preheated (60 °C) water addition to form 1:1 mixture with desired concentration. Purified water (18.2  $\text{M}\Omega\cdot\text{cm}$  resistivity at 25 °C) from Direct-Q 5 UV equipment was used for all solution preparation.

**Table S1:** The distribution of sizes (diameter, nm), polydispersity index values (PdI) and Zeta Potential of **2b**, **2d**, **2e**, **2f**, **2h** particles in water, 25 °C.Mean  $\pm$  standard deviation from three independent samples,

| Dye           | Dye concentration, wt % | Diameter, nm          |               |                 | Zeta            | Diameter, nm           |              | PdI             | Diameter, nm           |              | PdI             |
|---------------|-------------------------|-----------------------|---------------|-----------------|-----------------|------------------------|--------------|-----------------|------------------------|--------------|-----------------|
|               |                         | Intensity, %          | Number, %     | PdI             | Potential, mV   | Intensity, %           | Number, %    | Intensity, %    | Number, %              |              |                 |
|               |                         | storage time: 1st day |               |                 |                 | storage time: 12th day |              |                 | storage time: 80th day |              |                 |
| <b>2b</b> *   | 0.02                    | 712 $\pm$ 148         | 712 $\pm$ 148 | 0.15 $\pm$ 0.02 | -               | not stable             | not stable   |                 | not stable             | not stable   |                 |
| <b>2d</b> *   | 0.02                    | 164 $\pm$ 28          | 106 $\pm$ 21  | 0.08 $\pm$ 0.02 | -34.1 $\pm$ 0.5 | 164 $\pm$ 26           | 91 $\pm$ 19  | 0.1 $\pm$ 0.01  | 164 $\pm$ 27           | 106 $\pm$ 22 | 0.08 $\pm$ 0.01 |
| <b>2d</b> **  | 0.02                    | 190 $\pm$ 25          | 122 $\pm$ 20  | 0.28 $\pm$ 0.04 | -               | -                      | -            | -               | -                      | -            | -               |
| <b>2d</b> *   | 0.05                    | 255 $\pm$ 28          | 142 $\pm$ 23  | 0.27 $\pm$ 0.03 | -40 $\pm$ 2     | -                      | -            | -               | -                      | -            | -               |
| <b>2d</b> *   | 0.1                     | 1484 $\pm$ 20         | 1282 $\pm$ 20 | 0.25 $\pm$ 0.03 | -18.8 $\pm$ 0.5 | -                      | -            | -               | -                      | -            | -               |
| <b>2e</b> *   | 0.02                    | 164 $\pm$ 29          | 106 $\pm$ 22  | 0.07 $\pm$ 0.02 | -27.8 $\pm$ 0.7 | -                      | -            | -               | -                      | -            | -               |
| <b>2f</b> *   | 0.02                    | 220 $\pm$ 33          | 122 $\pm$ 22  | 0.15 $\pm$ 0.02 | -30.1 $\pm$ 0.7 | 190 $\pm$ 31           | 142 $\pm$ 27 | 0.17 $\pm$ 0.01 | 220 $\pm$ 35           | 142 $\pm$ 25 | 0.12 $\pm$ 0.03 |
| <b>2h</b> *   | 0.02                    | 255 $\pm$ 35          | 142 $\pm$ 22  | 0.14 $\pm$ 0.01 | -38.6 $\pm$ 0.8 | 255 $\pm$ 36           | 164 $\pm$ 27 | 0.14 $\pm$ 0.02 | 255 $\pm$ 45           | 190 $\pm$ 35 | 0.11 $\pm$ 0.02 |
| <b>2h</b> *** | 0.02                    | 342 $\pm$ 64          | 255 $\pm$ 47  | 0.33 $\pm$ 0.04 | -               | 295 $\pm$ 33           | 190 $\pm$ 25 | 0.25 $\pm$ 0.03 | 342 $\pm$ 68           | 295 $\pm$ 59 | 0.25 $\pm$ 0.05 |

\* using organic solvent DMF

\*\* synthesis in phosphate buffer

\*\*\* using organic solvent THF

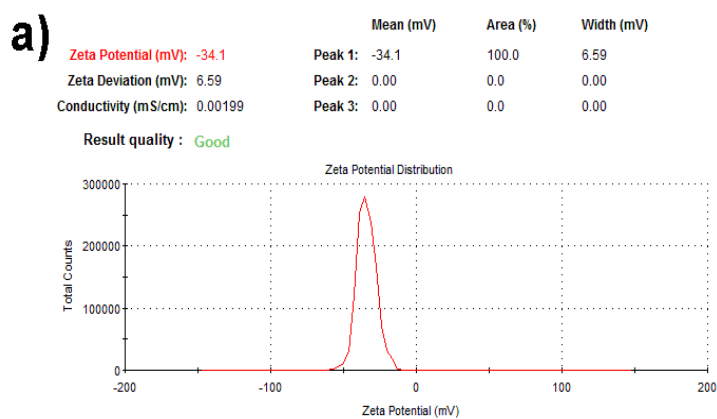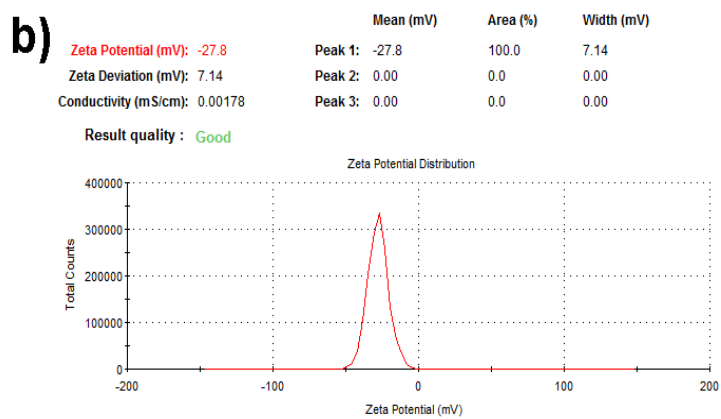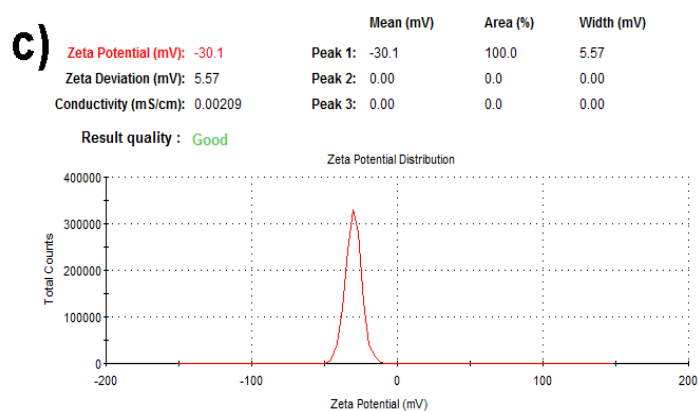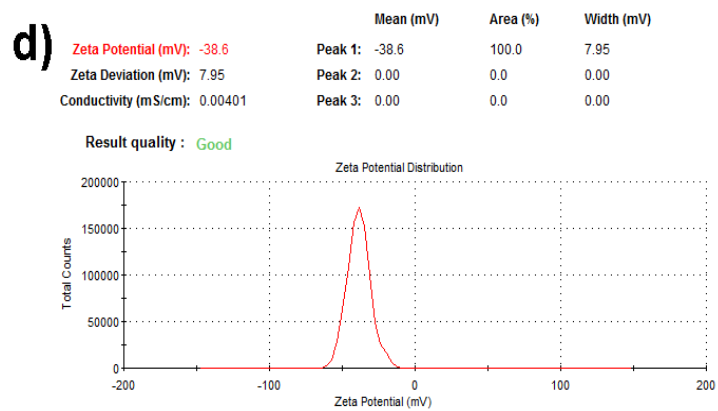

**Figure S1:** Zeta potential (mV) of **2d** (a), **2e** (b), **2f** (c) and **2h** (d) particles in water, 25 °C.

|                                | Diam. (nm)           | % Number | Width (nm) |
|--------------------------------|----------------------|----------|------------|
| <b>Z-Average (d.nm):</b> 871.4 | <b>Peak 1:</b> 157.5 | 56.9     | 52.06      |
| <b>PdI:</b> 0.443              | <b>Peak 2:</b> 698.5 | 43.1     | 370.6      |
| <b>Intercept:</b> 0.883        | <b>Peak 3:</b> 0.000 | 0.0      | 0.000      |

**Result quality :** Good

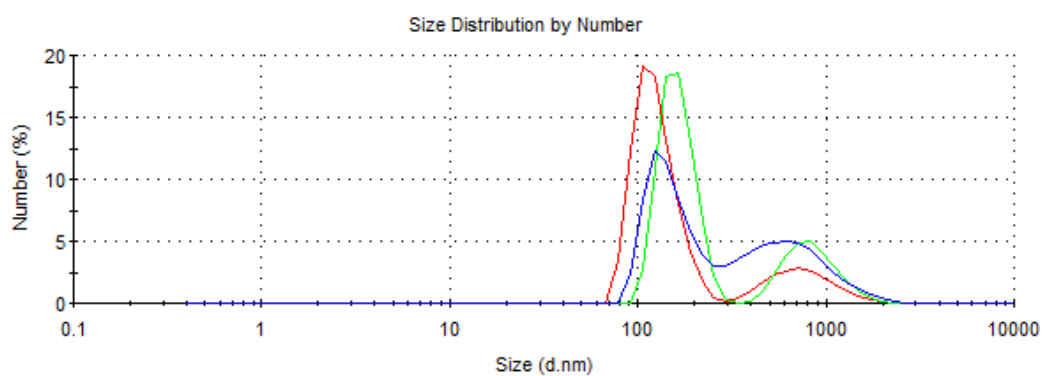

**Figure S2:** Analysis of the size distribution of **2d** particles after incubation in phosphate buffer, pH 7.4, 37 °C.

**Table S2:** The distribution of sizes (diameter, nm) of **2c–g** particles in water/DMF (50% v/v) solutions using the number parameter and polydispersity index values (PdI) of the system, 25 °C. Mean  $\pm$  standard deviation from three independent samples.

| Concentration<br>(mM) | <b>2c</b>        |                  | <b>2d</b>                    |                  | <b>2e</b>        |                  | <b>2f</b>        |                 | <b>2g</b>        |                  |
|-----------------------|------------------|------------------|------------------------------|------------------|------------------|------------------|------------------|-----------------|------------------|------------------|
|                       | Diameter<br>(nm) | PdI              | Diameter<br>(nm)             | PdI              | Diameter<br>(nm) | PdI              | Diameter<br>(nm) | PdI             | Diameter<br>(nm) | PdI              |
| 0.01                  |                  |                  | -                            | -                | -                | -                | -                | -               | 142 $\pm$ 35     | 0.06 $\pm$ 0.02  |
| 0.02                  |                  |                  | 59 $\pm$ 10;<br>220 $\pm$ 25 | 0.14 $\pm$ 0.03  | 164 $\pm$ 42     | 0.05 $\pm$ 0.03  | -                | -               | 106 $\pm$ 35     | 0.06 $\pm$ 0.02  |
| 0.04                  |                  |                  | -                            | -                | -                | -                | -                | -               | 106 $\pm$ 30     | 0.06 $\pm$ 0.03  |
| 0.05                  |                  |                  | 68 $\pm$ 3; 164 $\pm$ 34     | 0.08 $\pm$ 0.03  | 164 $\pm$ 50     | 0.024 $\pm$ 0.01 | -                | -               | 106 $\pm$ 32     | 0.05 $\pm$ 0.03  |
| 0.08                  |                  |                  | -                            | -                | -                | -                | -                | -               | 142 $\pm$ 38     | 0.05 $\pm$ 0.02  |
| 0.1                   |                  |                  | 164 $\pm$ 39                 | 0.085 $\pm$ 0.02 | 164 $\pm$ 47     | 0.032 $\pm$ 0.02 | -                | -               | 106 $\pm$ 35     | 0.04 $\pm$ 0.02  |
| 0.2                   |                  |                  | 164 $\pm$ 37                 | 0.056 $\pm$ 0.02 | 142 $\pm$ 38     | 0.055 $\pm$ 0.03 | 164 $\pm$ 44     | 0.05 $\pm$ 0.03 | 92 $\pm$ 21      | 0.08 $\pm$ 0.03  |
| 0.4                   | 396 $\pm$ 95     | 0.082 $\pm$ 0.02 | -                            | -                | -                | -                | -                | -               | 190 $\pm$ 46     | 0.02 $\pm$ 0.01  |
| 0.5                   |                  |                  | 295 $\pm$ 86                 | 0.105 $\pm$ 0.04 | 190 $\pm$ 67     | 0.06 $\pm$ 0.02  | 164 $\pm$ 40     | 0.07 $\pm$ 0.04 | 123 $\pm$ 28     | 0.045 $\pm$ 0.02 |
| 0.6                   | 342 $\pm$ 89     | 0.07 $\pm$ 0.05  | -                            | -                | -                | -                | -                | -               | 123 $\pm$ 27     | 0.06 $\pm$ 0.03  |
| 1                     | 712 $\pm$ 131    | 0.04 $\pm$ 0.01  | 190 $\pm$ 65                 | 0.04 $\pm$ 0.04  | 164 $\pm$ 61     | 0.03 $\pm$ 0.02  | 190 $\pm$ 49     | 0.13 $\pm$ 0.05 | 123 $\pm$ 27     | 0.05 $\pm$ 0.02  |
| 2                     |                  |                  | 342 $\pm$ 54                 | 0.154 $\pm$ 0.02 | -                | -                | 460 $\pm$ 150    | 0.04 $\pm$ 0.02 | 240 $\pm$ 64     | 0.21 $\pm$ 0.1   |

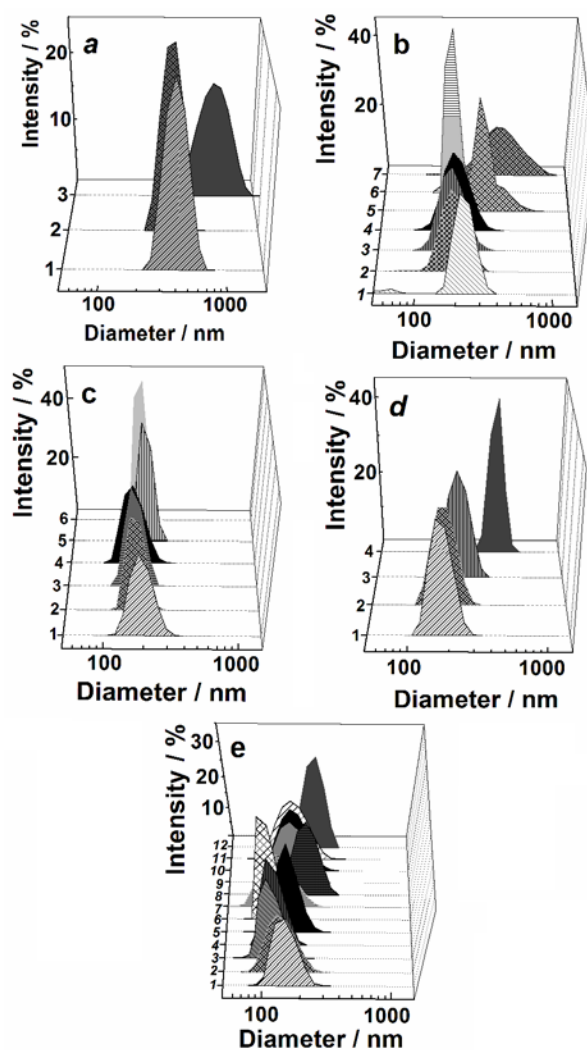

**Figure S3:** Analysis of the size distribution of **2c–g** particles in water/DMF (50% v/v) solutions using the intensity parameter, 25 °C, a -  $C_{2c}$ , mM: 0.4 (1); 0.6 (2); 1 (3); b -  $C_{2d}$ , mM: 0.02 (1); 0.05 (2); 0.1 (3); 0.2 (4); 0.5 (5); 1 (6); 2 (7); c -  $C_{2e}$ , mM: 0.02 (1); 0.05 (2); 0.1 (3); 0.2 (4); 0.5 (5); 1 (6); d -  $C_{2f}$ , mM: 0.2 (1); 0.5 (2); 1 (3); 2 (4); e -  $C_{2g}$ , mM: 0.01 (1); 0.02 (2); 0.04 (3); 0.05 (4); 0.08 (5); 0.1 (6); 0.2 (7); 0.4 (8); 0.5 (9); 0.6 (10); 1 (11); 2 (12).



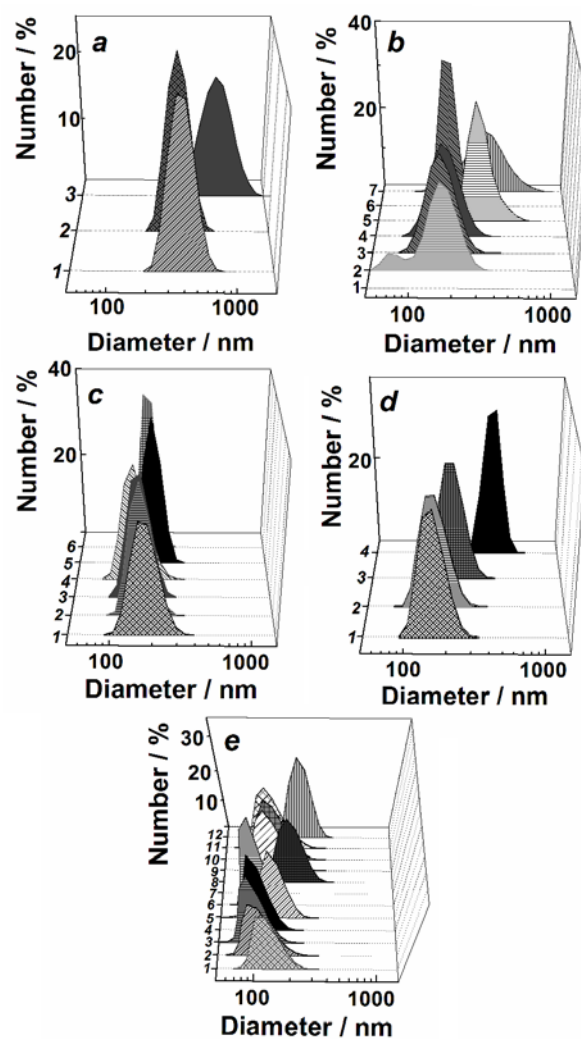

**Figure S4:** Analysis of the size distribution of **2c–g** particles in water/DMF (50% v/v) solutions using the number parameter, 25 °C, (a) -  $C_{2c}$ , mM: 0.4 (1); 0.6 (2); 1 (3); (b) -  $C_{2d}$ , mM: 0.02 (1); 0.05 (2); 0.1 (3); 0.2 (4); 0.5 (5); 1 (6); 2 (7); (c) -  $C_{2e}$ , mM: 0.02 (1); 0.05 (2); 0.1 (3); 0.2 (4); 0.5 (5); 1 (6); (d) -  $C_{2f}$ , mM: 0.2 (1); 0.5 (2); 1 (3); 2 (4); (e) -  $C_{2g}$ , mM: 0.01 (1); 0.02 (2); 0.04 (3); 0.05 (4); 0.08 (5); 0.1 (6); 0.2 (7); 0.4 (8); 0.5 (9); 0.6 (10); 1 (11); 2 (12).

|                              | Mean (mV)     | Area (%) | Width (mV) |
|------------------------------|---------------|----------|------------|
| Zeta Potential (mV): -30.6   | Peak 1: -30.6 | 100.0    | 9.89       |
| Zeta Deviation (mV): 9.89    | Peak 2: 0.00  | 0.0      | 0.00       |
| Conductivity (mS/cm): 0.0177 | Peak 3: 0.00  | 0.0      | 0.00       |

Result quality : **Good**

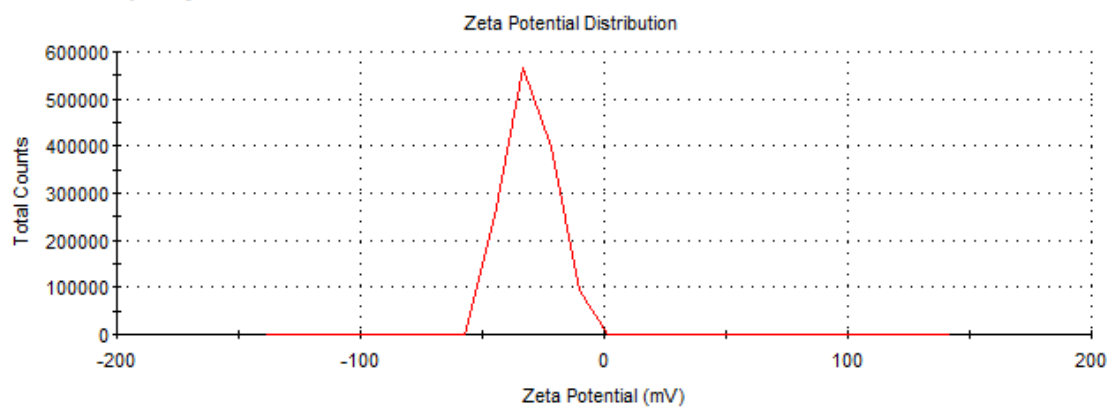

**Figure S5:** Zeta potential (mV) of **2h** particles in water/DMF (50% v/v), 25 °C,  $C_{2h}$ , mM: 0.2.

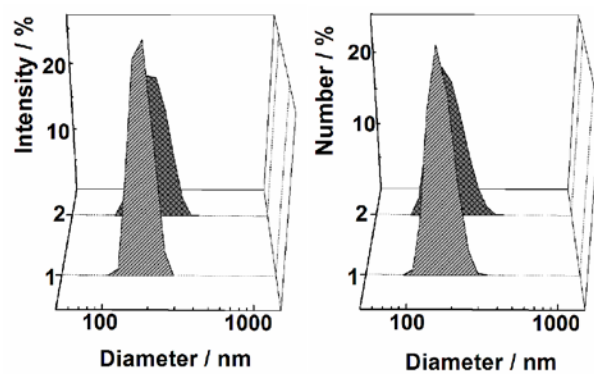

**Figure S6:** Analysis of the size distribution of **2h** particles in water/DMF (50% v/v) solutions using the intensity and number parameters, 50 °C,  $C_{2h}$ , mM: 0.4 (1); 0.6 (2).

|                         | Diam. (nm)    | % Number | Width (nm) |
|-------------------------|---------------|----------|------------|
| Z-Average (d.nm): 437.2 | Peak 1: 414.8 | 100.0    | 121.7      |
| Pdl: 0.046              | Peak 2: 0.000 | 0.0      | 0.000      |
| Intercept: 0.934        | Peak 3: 0.000 | 0.0      | 0.000      |

Result quality : **Good**

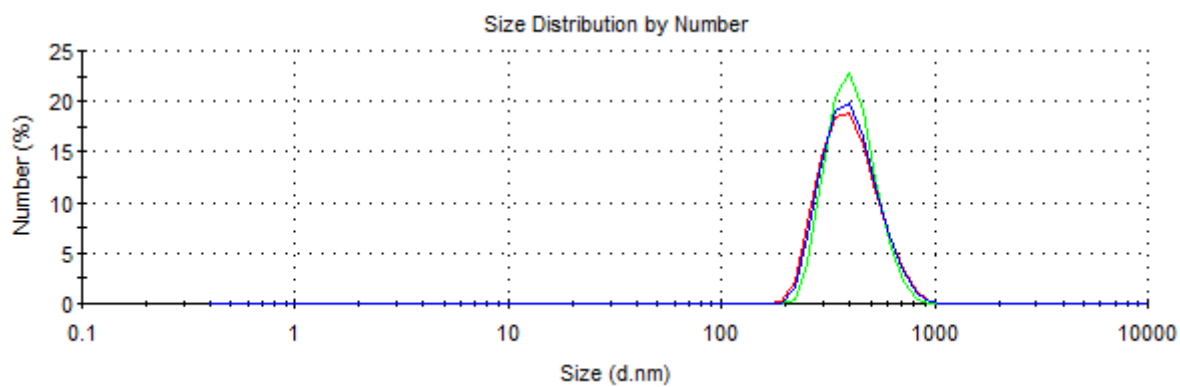

**Figure S7:** Analysis of the size distribution of **2g** in phosphate buffer/DMF (50% v/v) solutions using number parameters, 25 °C,  $C_{2g}$ , mM: 0.6.

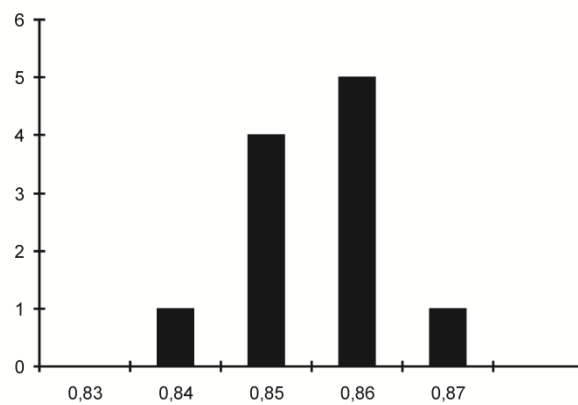

**Figure S8:** The histogram of the head fragment surface distribution in the isoindigo derivatives for which the data are present in the Cambridge Structural Database.

**Table S3:** The volume of the hydrophobic spacer,  $v_0$ , the polar head surface area,  $a$ , the chain length of the hydrophobic fragment,  $l$  and the packing parameter,  $P$ .

| dye       | $l$ , nm | $v_0$ , nm <sup>3</sup> | $a$ , nm <sup>2</sup> | $P$  |
|-----------|----------|-------------------------|-----------------------|------|
| <b>1g</b> | 2.17     | 0.46                    | 0.86 <sup>a</sup>     | 0.25 |
| <b>2a</b> | 0.28     | 0.11                    | 0.86                  | 0.46 |
| <b>2b</b> | 0.91     | 0.38                    | 0.86                  | 0.49 |
| <b>2c</b> | 1.16     | 0.49                    | 0.86 <sup>b</sup>     | 0.5  |
| <b>2d</b> | 1.41     | 0.6                     | 0.85 <sup>c</sup>     | 0.5  |
| <b>2e</b> | 1.67     | 0.7                     | 0.86                  | 0.49 |
| <b>2f</b> | 1.92     | 0.81                    | 0.86                  | 0.49 |
| <b>2g</b> | 2.17     | 0.92                    | 0.86                  | 0.49 |
| <b>2h</b> | 2.42     | 1.02                    | 0.86                  | 0.49 |
| <b>3</b>  | 2.17     | 0.46                    | 1.72                  | 0.12 |

<sup>a</sup> reference [2]

<sup>b</sup> reference [3]

<sup>c</sup> reference [4]

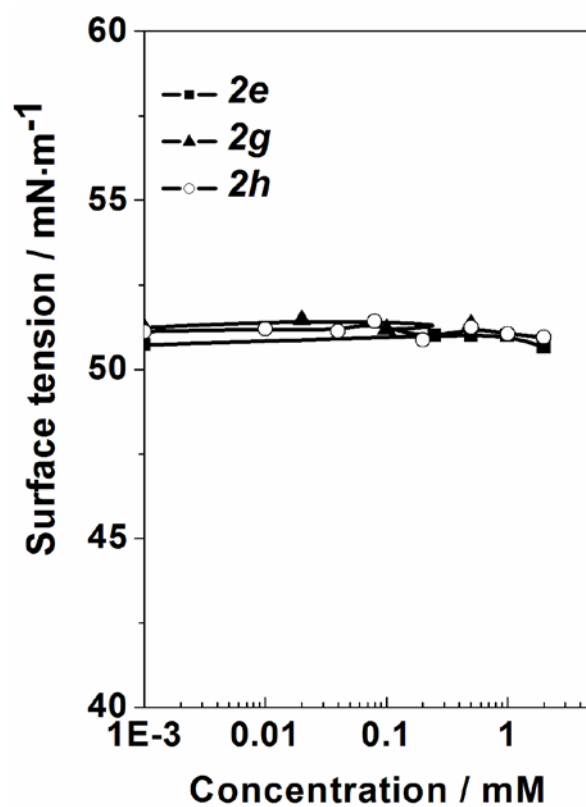

**Figure S9:** Surface tension isotherms of **2e**, **2g**, **2h** in water/DMF (50% v/v) solution; 25 °C.

**Table S4:** CMC values and solubilization capacity, determined by the method of solubilization of Sudan I; 25 °C

| Compound  | CMC $\times 10^3$ ,<br>M | Solubilization<br>capacity |
|-----------|--------------------------|----------------------------|
| <b>2g</b> | 0.2                      | 0.4                        |
| <b>2h</b> | 0.1                      | 0.52                       |
| SDS       | 10                       | 0.027                      |
| CTAB      | 0.98 <sup>b</sup>        | 0.189                      |

<sup>a</sup>CMC value determined by fluorimetry

<sup>b</sup>from [5] at 30 °C.

Solubilization capacity ( $S$ ) is the parameter of system, which quantitatively characterizes its ability to solubilize (bind) organic substrate. According to the published data,  $S$  value, that is, number of moles of dye solubilized by one mole micellized surfactant, can be calculated by Equation S1 [6]:

$$S = B / \varepsilon L \quad , \quad (S1)$$

where  $B$  is the parameter of slope (slope of the dependence of absorbance of dye vs surfactant concentration above CMC),  $\varepsilon$  is the extinction coefficient of dye ( $\varepsilon = 8700 \text{ M}^{-1} \cdot \text{cm}^{-1}$ ), and  $L$  is the length of the optical path.



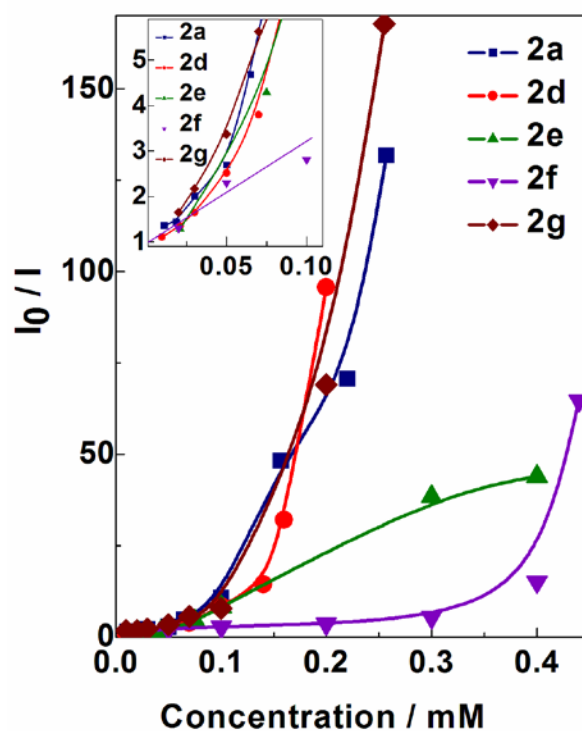

**Figure S10:** Dependence of the intensity ratio ( $I_0/I$ ) for pyrene in the absence ( $I_0$ ) and in the presence of the **2a**, **2d–2g** ( $I$ ) on their concentration in water/DMF (50% v/v) solutions, 25 °C.

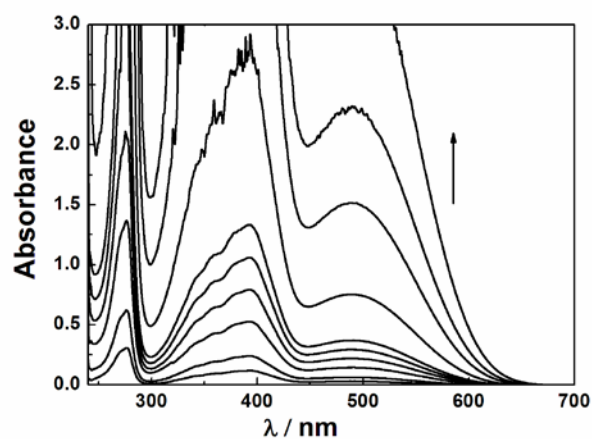

**Figure S11:** Absorption profile of **2a** in chloroform,  $C_{2a}$  (mM): 0.01; 0.02; 0.04; 0.06; 0.08; 0.1; 0.2; 0.4; 0.6; 1,  $L = 1$  cm.

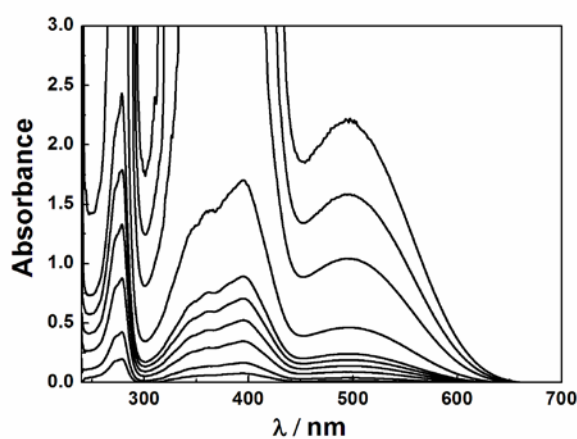

**Figure S12:** Absorption profile of **2c** in chloroform,  $C_{2c}$  (mM): 0.01; 0.02; 0.04; 0.06; 0.08; 0.1; 0.2; 0.4; 0.6; 0.8 mM,  $L = 1$  cm.

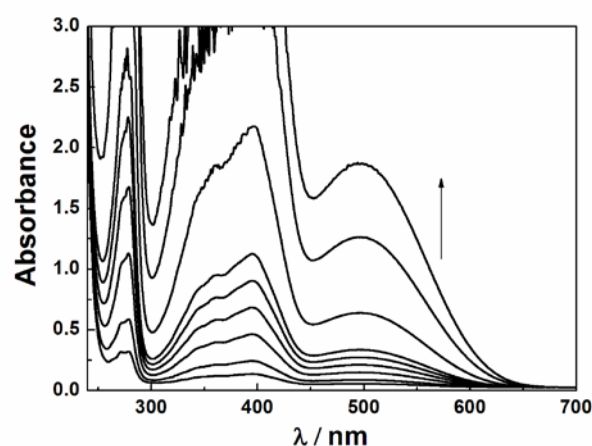

**Figure S13:** Absorption profile of **2d** in chloroform,  $C_{2d}$  (mM): 0.01; 0.02; 0.04; 0.06; 0.08; 0.1; 0.2; 0.4; 0.6 mM,  $L = 1$  cm.

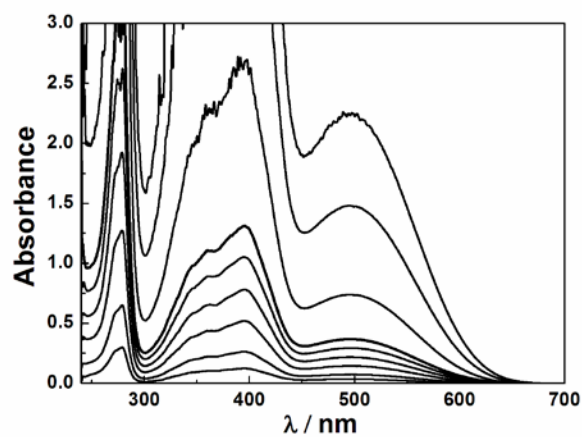

**Figure S14:** Absorption profile of **2e** in chloroform,  $C_{2e}$  (mM): 0.01; 0.02; 0.04; 0.06; 0.08; 0.1; 0.2; 0.4; 0.6 mM,  $L = 1$  cm.

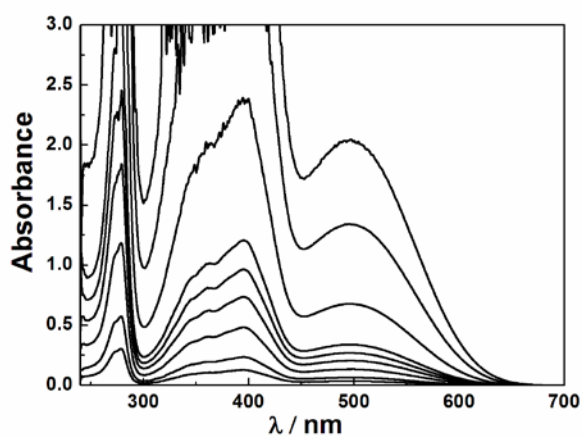

**Figure S15:** Absorption profile of **2f** in chloroform,  $C_{2f}$  (mM): 0.01; 0.02; 0.04; 0.06; 0.08; 0.1; 0.2; 0.4; 0.6 mM,  $L = 1$  cm.

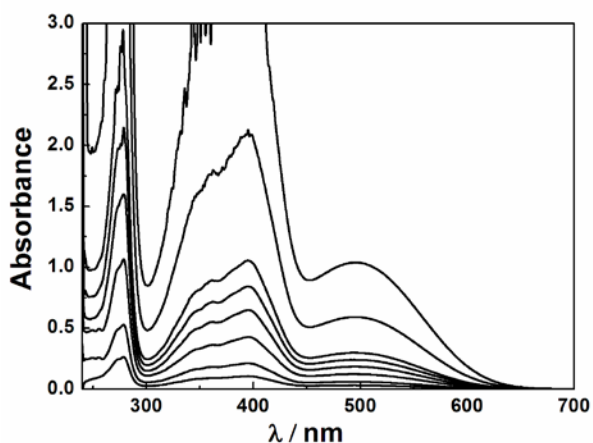

**Figure S16:** Absorption profile of **2g** in chloroform,  $C_{2g}$  (mM): 0.01; 0.02; 0.04; 0.06; 0.08; 0.1; 0.2; 0.3;  $L = 1$  cm.

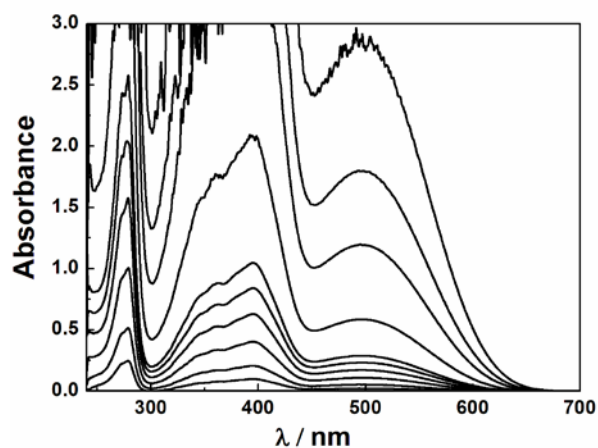

**Figure S17:** Absorption profile of **2h** in chloroform,  $C_{2h}$  (mM): 0.01; 0.02; 0.04; 0.06; 0.08; 0.1; 0.2; 0.4; 0.6; 1,  $L = 1$  cm.

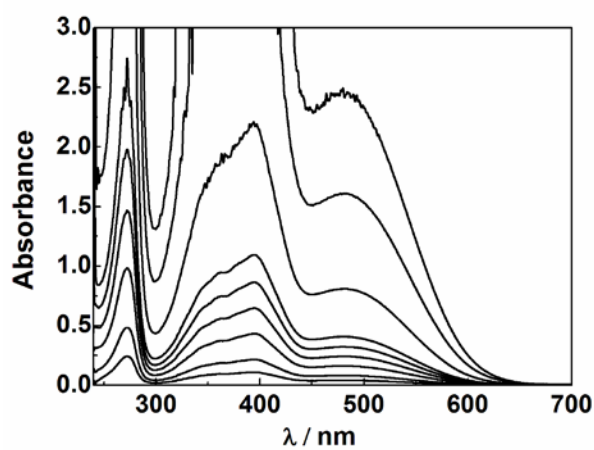

**Figure S18:** Absorption profile of **3** in chloroform,  $C_3$  (mM): 0.01; 0.02; 0.04; 0.06; 0.08; 0.1; 0.2; 0.4; 0.6,  $L = 1$  cm.

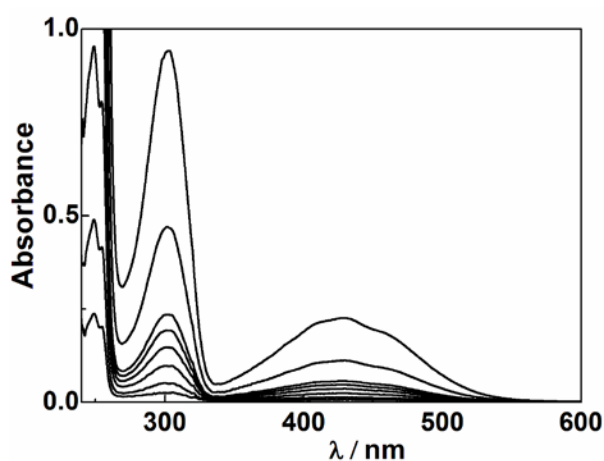

**Figure S19:** Absorption profile of **1g** in chloroform,  $C_{1g}$  (mM): 0.0125; 0.025; 0.05; 0.075; 0.1; 0.125; 0.25; 0.5,  $L = 1$  cm.

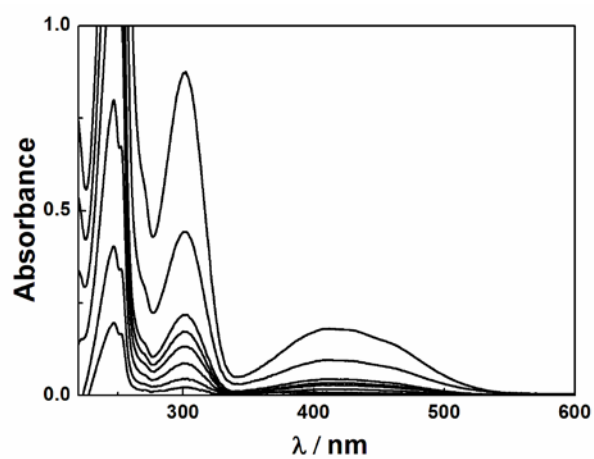

**Figure S20:** Absorption profile of **1g** in ethanol,  $C_{1g}$  (mM): 0.0125; 0.025; 0.05; 0.075; 0.1; 0.125; 0.25; 0.5,  $L = 1$  cm.

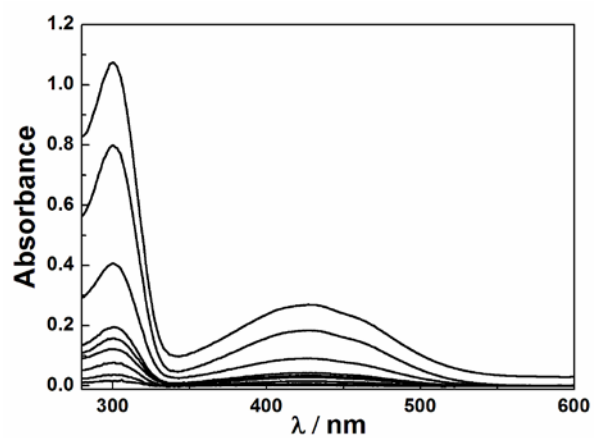

**Figure S21:** Absorption profile of **1g** in DMF,  $C_{1g}$  (mM): 0.01; 0.02; 0.04; 0.06; 0.08; 0.1; 0.2; 0.4; 1,  $L = 1$  cm.

**Table S5:** Molar extinction coefficient ( $\epsilon$ ) of **1g**, **2a**, **2c**, **2d**, **2e–h** and **3**.

| Dye                   | $\lambda_{\max}/\text{nm}/$<br>( $\epsilon/\text{M}^{-1} \text{cm}^{-1}$ ) | $\lambda_{\max}/\text{nm}/$<br>( $\epsilon/\text{M}^{-1} \text{cm}^{-1}$ ) | $\lambda_{\max}/\text{nm}/$<br>( $\epsilon/\text{M}^{-1} \text{cm}^{-1}$ ) |
|-----------------------|----------------------------------------------------------------------------|----------------------------------------------------------------------------|----------------------------------------------------------------------------|
| <b>1g<sup>a</sup></b> | 412 (366)                                                                  | 300 (1749)                                                                 | 247 (15783)                                                                |
| <b>1g<sup>b</sup></b> | 428 (466)                                                                  | 300 (2012)                                                                 | -                                                                          |
| <b>1g<sup>c</sup></b> | 428 (447)                                                                  | 300 (1864)                                                                 | 248 (18897)                                                                |
| <b>2a</b>             | 490 (3866)                                                                 | 393 (13447)                                                                | 275 (35871)                                                                |
| <b>2c</b>             | 495 (2647)                                                                 | 395 (8597)                                                                 | 278 (22419)                                                                |
| <b>2d</b>             | 495 (3083)                                                                 | 395 (10775)                                                                | 278 (27882)                                                                |
| <b>2e</b>             | 495 (3736)                                                                 | 395 (13156)                                                                | 278 (32211)                                                                |
| <b>2f</b>             | 495 (3384)                                                                 | 395 (11946)                                                                | 278 (29294)                                                                |
| <b>2g</b>             | 495 (2952)                                                                 | 395 (10761)                                                                | 278 (26773)                                                                |
| <b>2h</b>             | 495 (2936)                                                                 | 395 (10409)                                                                | 278 (25451)                                                                |
| <b>3</b>              | 480 (4167)                                                                 | 395 (10828)                                                                | 272 (24329)                                                                |

<sup>a</sup>EtOH<sup>b</sup>DMF<sup>c</sup>CHCl<sub>3</sub>

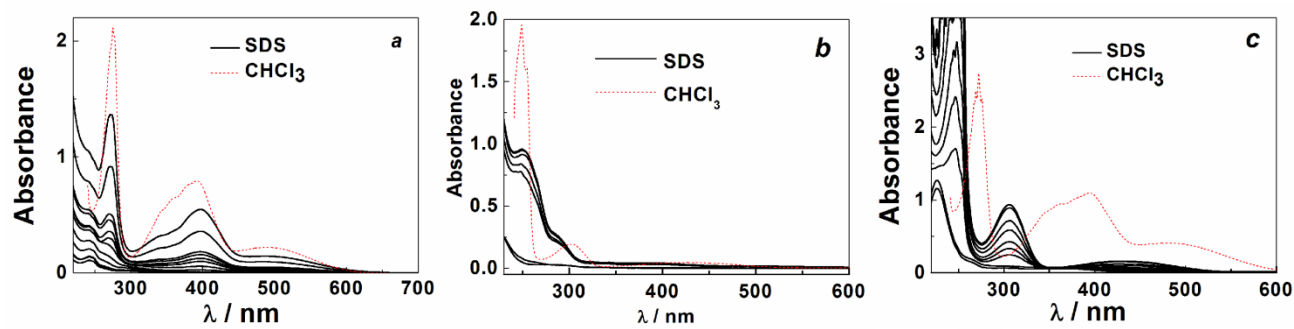

**Figure S22:** Absorption profile of **2a** (a), **1g** (b) and **3** (c) in chloroform and water-SDS solutions in the presence of increasing SDS concentration, 25 °C, (a):  $C_{\text{SDS}} = 1\text{--}60$  mM, (b):  $C_{\text{SDS}} = 2\text{--}200$  mM, (c):  $C_{\text{SDS}} = 2\text{--}200$  mM.



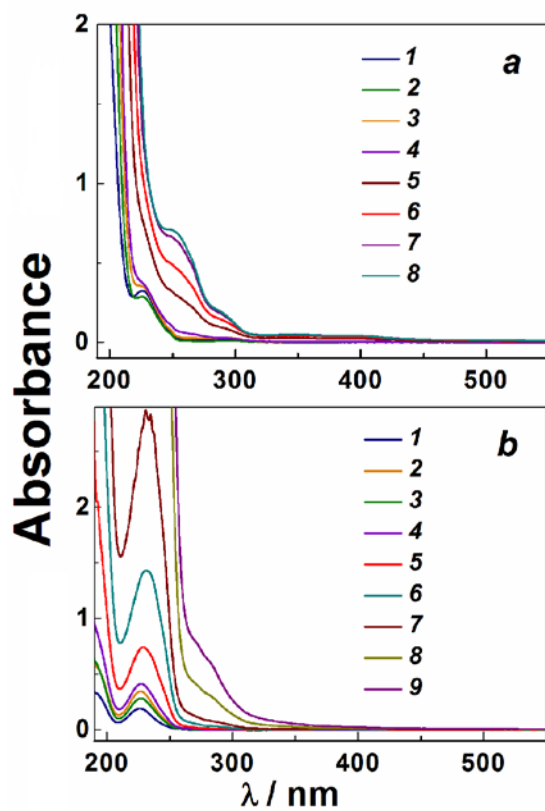

**Figure S23:** Absorption profile of the **3** in water–micellar solutions in the presence of increasing concentration of the CTAB (a) and Tween 80 (b), 25 °C,  $C_{\text{CTAB}}$ , mM: 0.2 (1); 0.4 (2); 0.6 (3); 0.8 (4); 2 (5); 5 (6); 10 (7); 20 (8),  $C_{\text{Tween 80}}$ , mM: 0.02 (1); 0.04 (2); 0.06 (3); 0.08 (4); 0.2 (5); 0.5 (6); 0.6 (7); 1 (8); 5 (9).

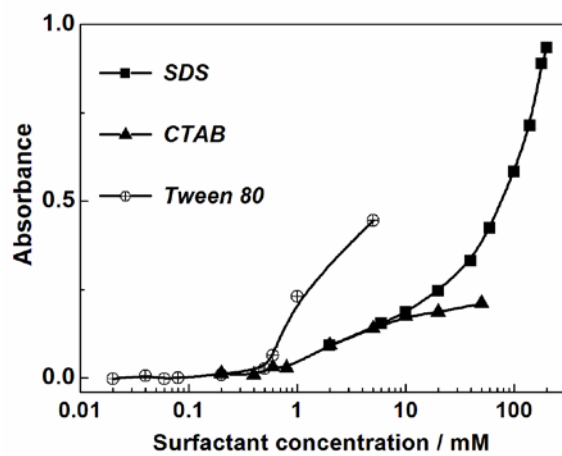

**Figure S24:** Absorbance of the **3** at  $\lambda_{\max} = 300$  nm in aqueous micellar surfactants solution, 25 °C; optical length 1 cm.

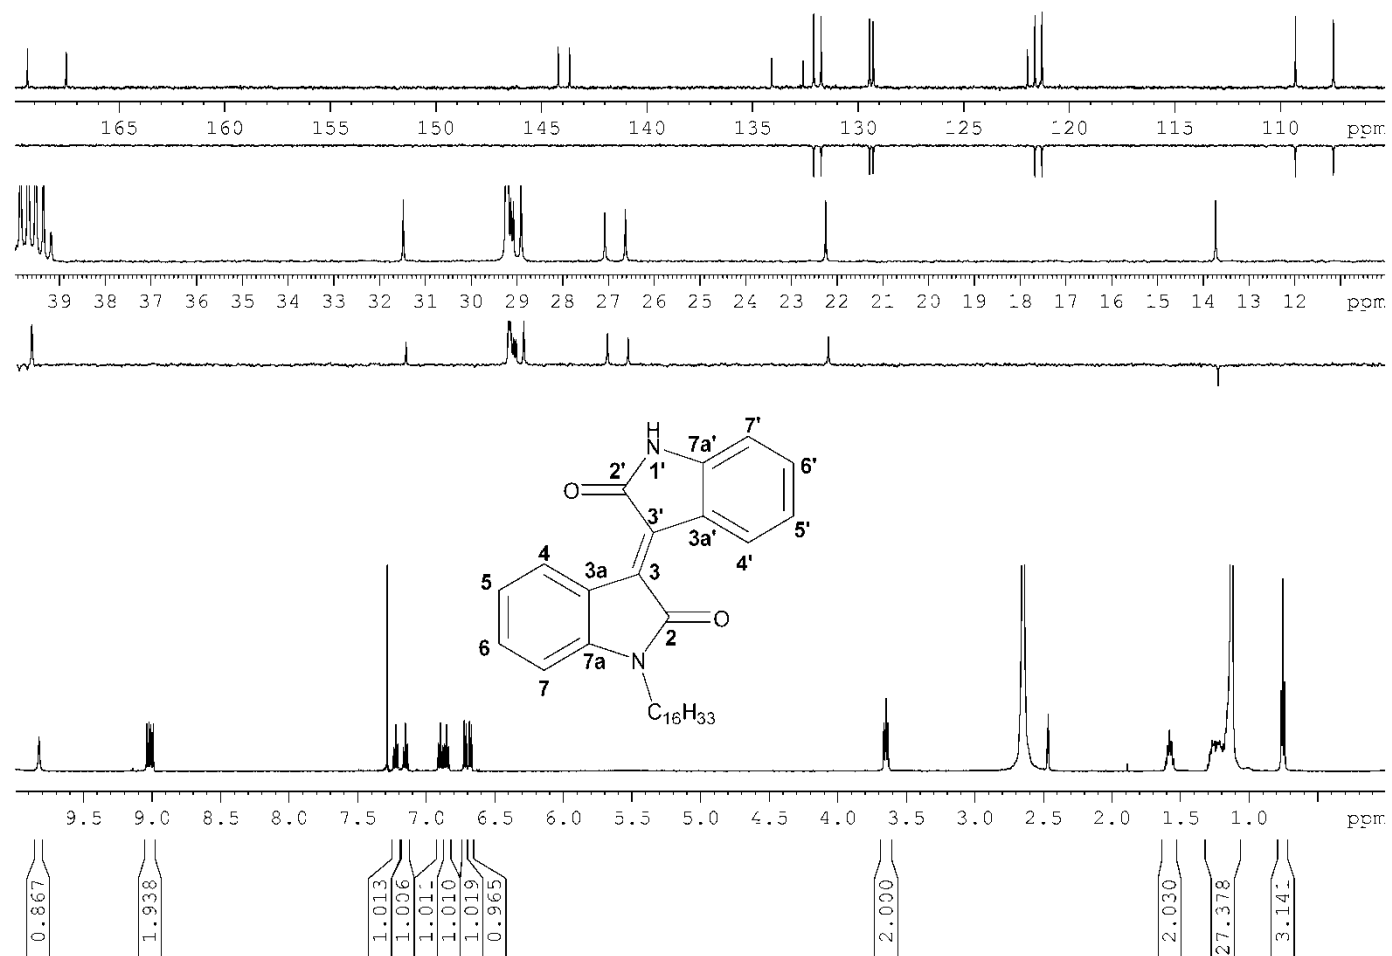

**Figure S25:** 1D  $^1\text{H}$ ,  $^{13}\text{C}$  DEPT and  $^{13}\text{C}\{^1\text{H}\}$  NMR spectra of **3**.

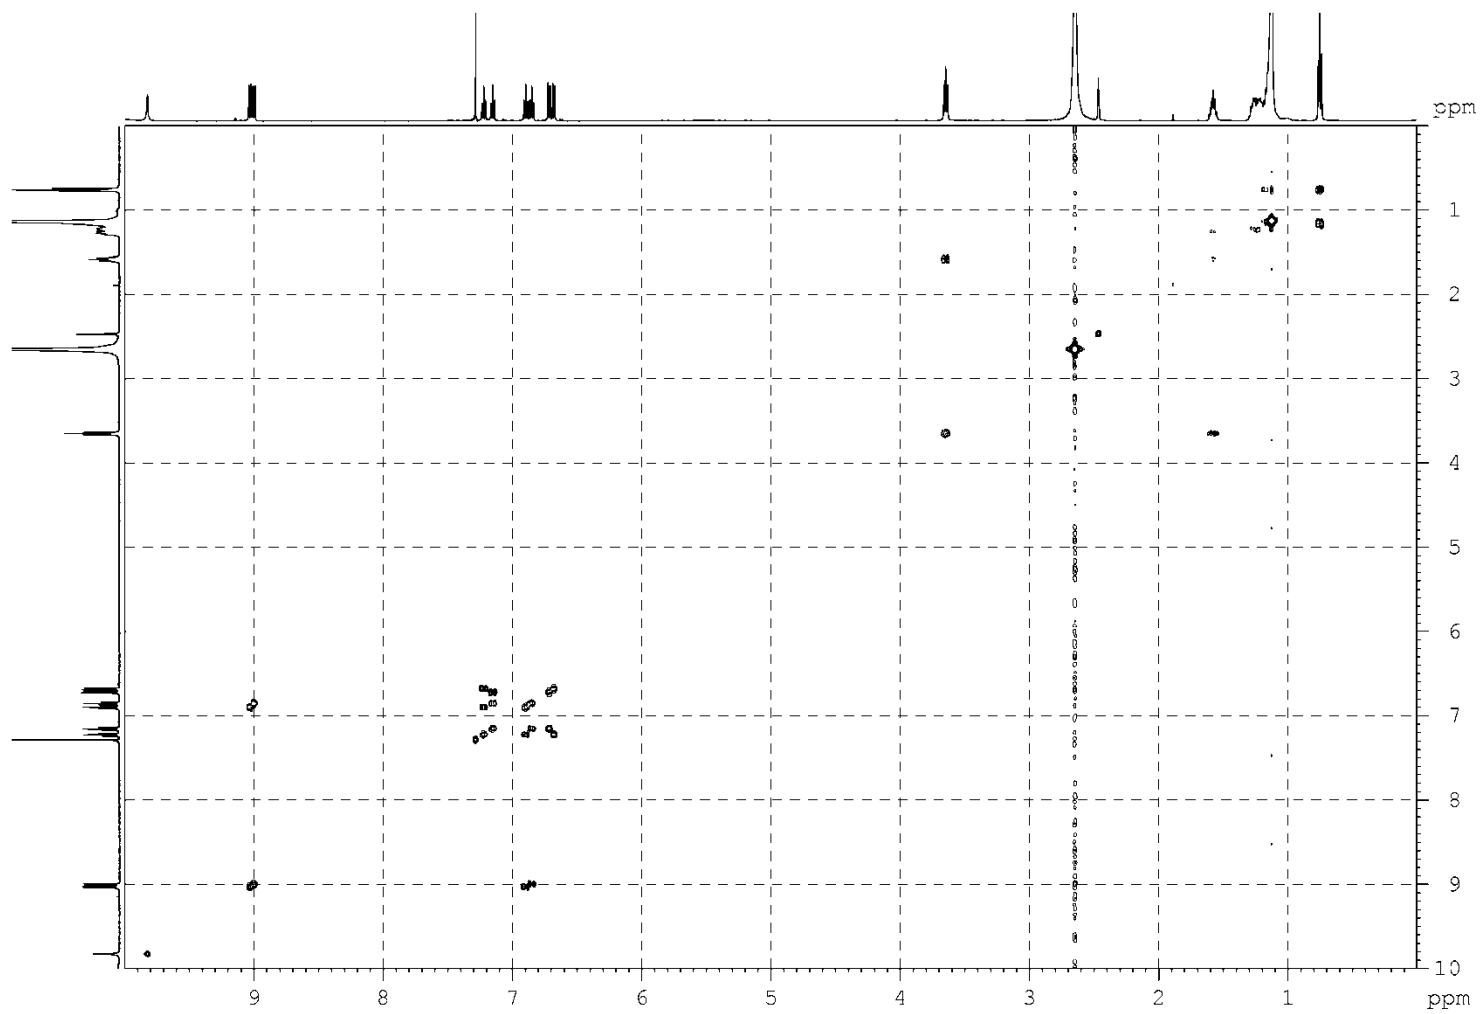

**Figure S26:** 2D  $^1\text{H}$ ,  $^1\text{H}$  COSY NMR spectra of **3**.

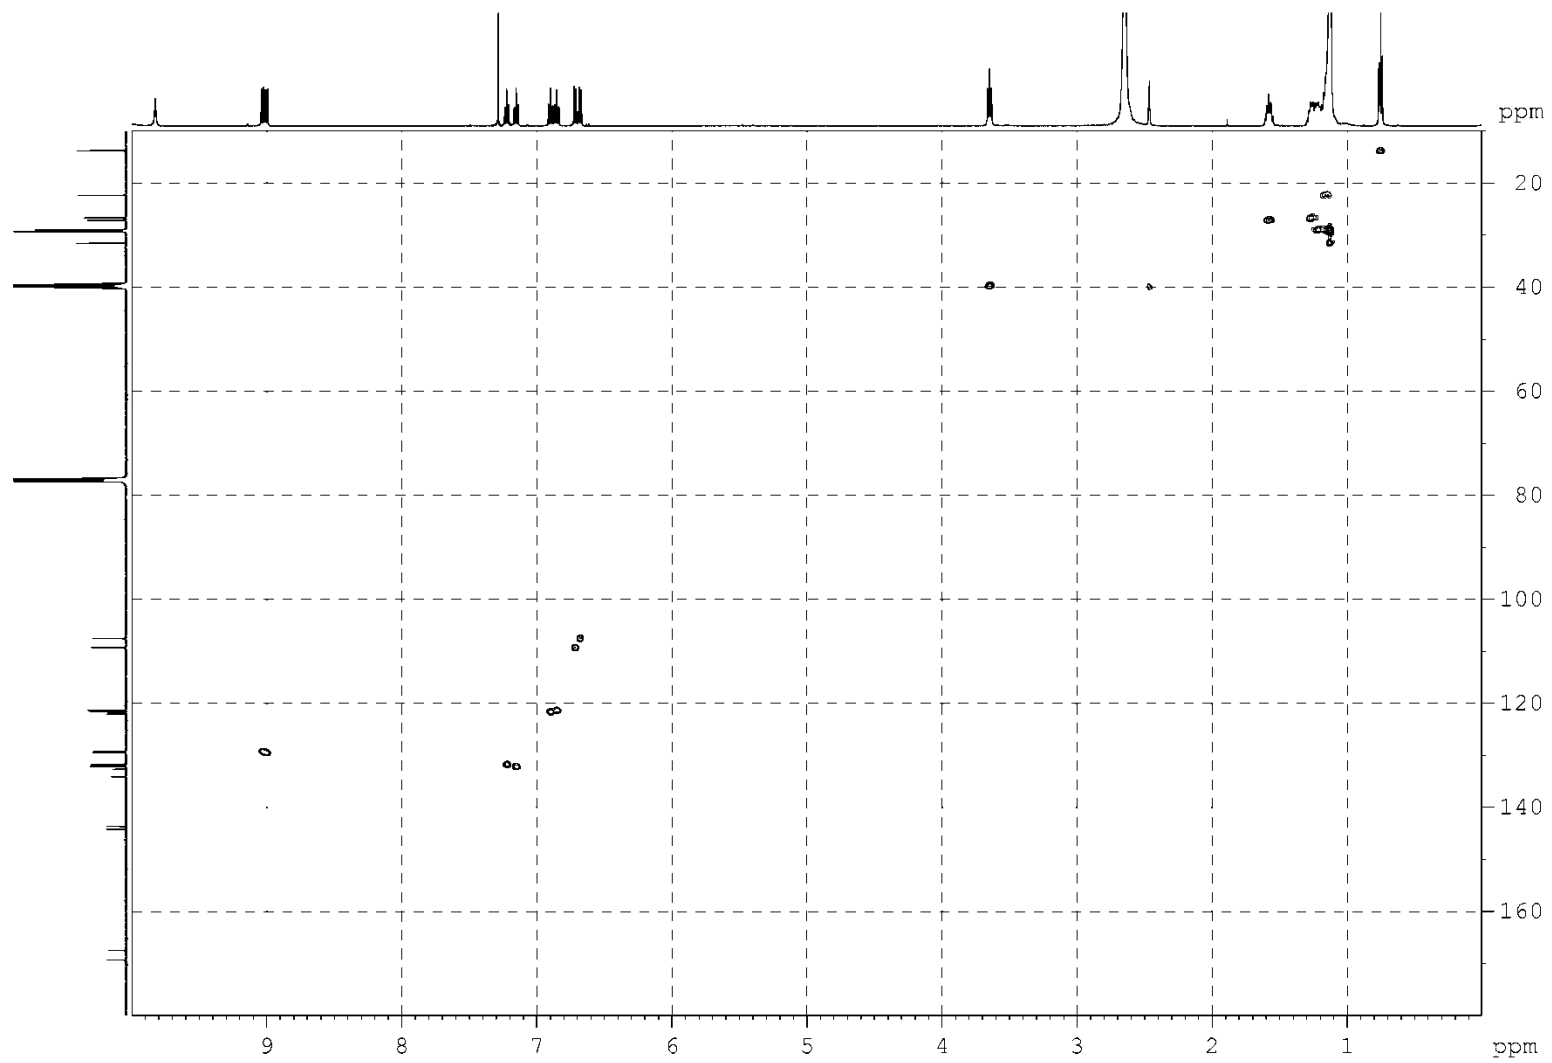

**Figure S27:** 2D  $^1\text{H}$ ,  $^{13}\text{C}$  HSQC NMR spectra of **3**.

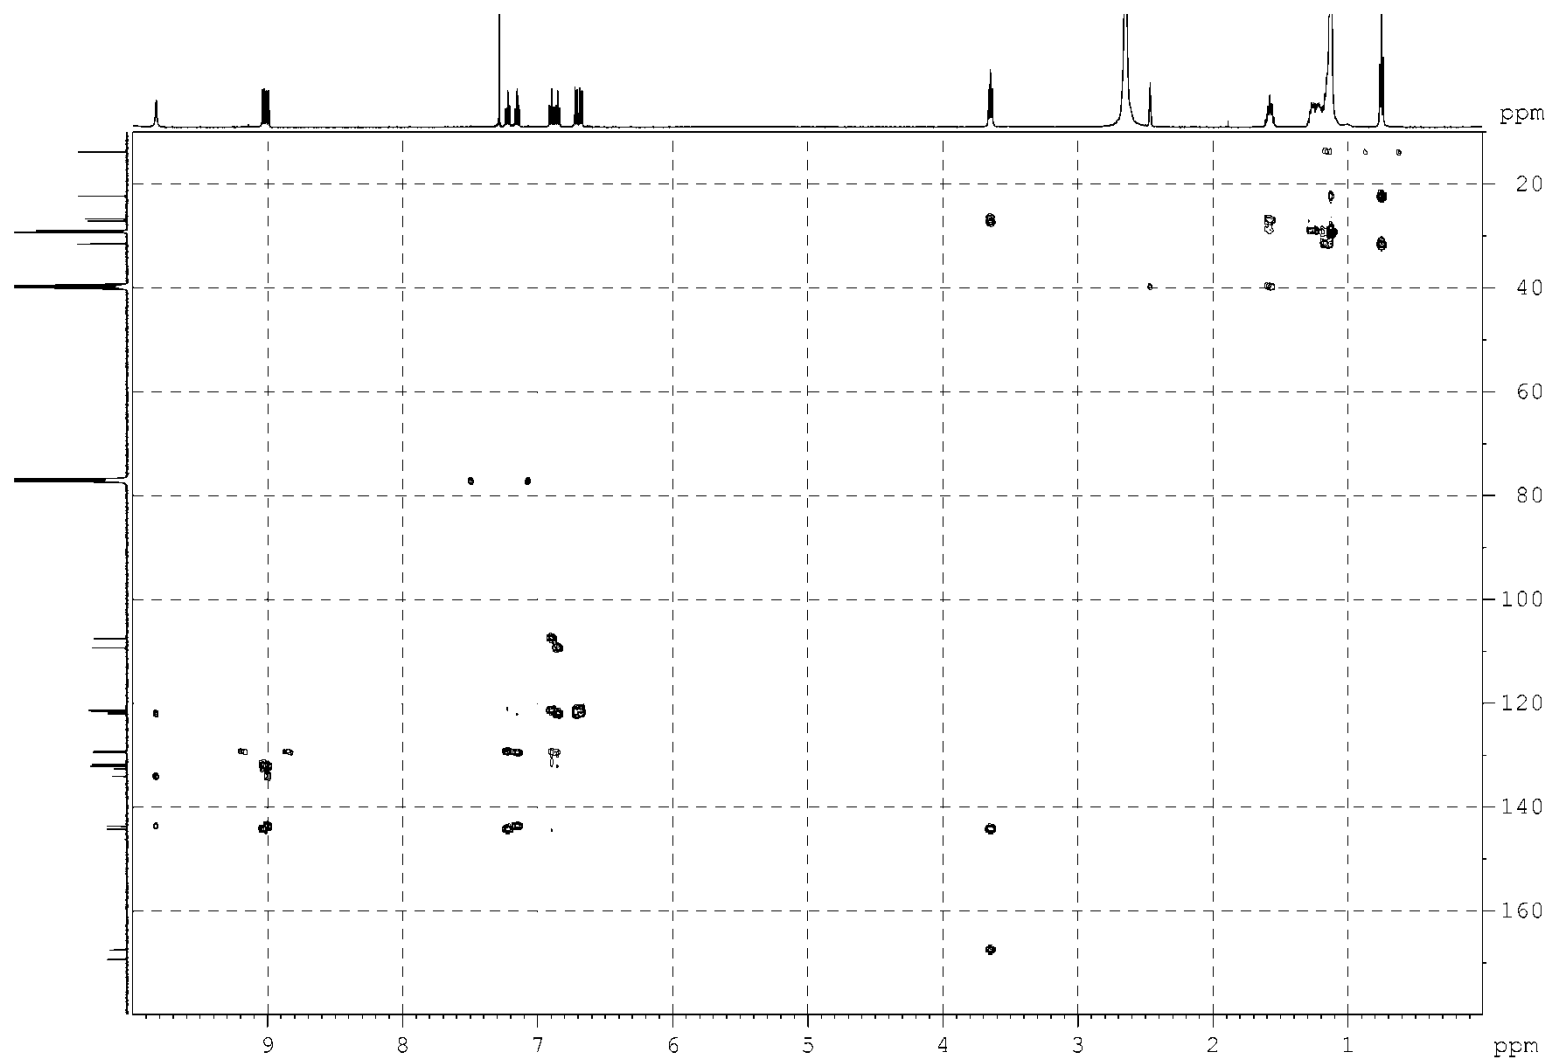

**Figure S28:** 2D  $^1\text{H}$ ,  $^{13}\text{C}$  HMBC NMR spectra of **3**.

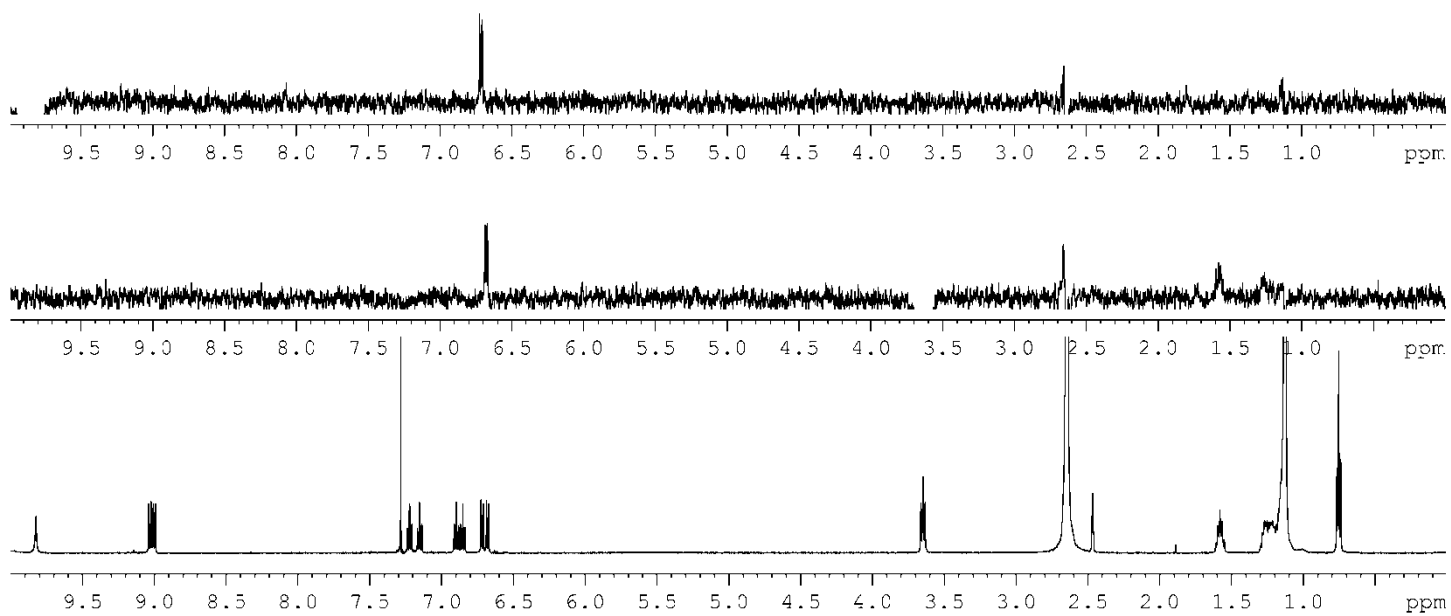

**Figure S29:** 1D  $^1\text{H}$  and  $^1\text{H}$  DPGNOE NMR spectra of **3**.

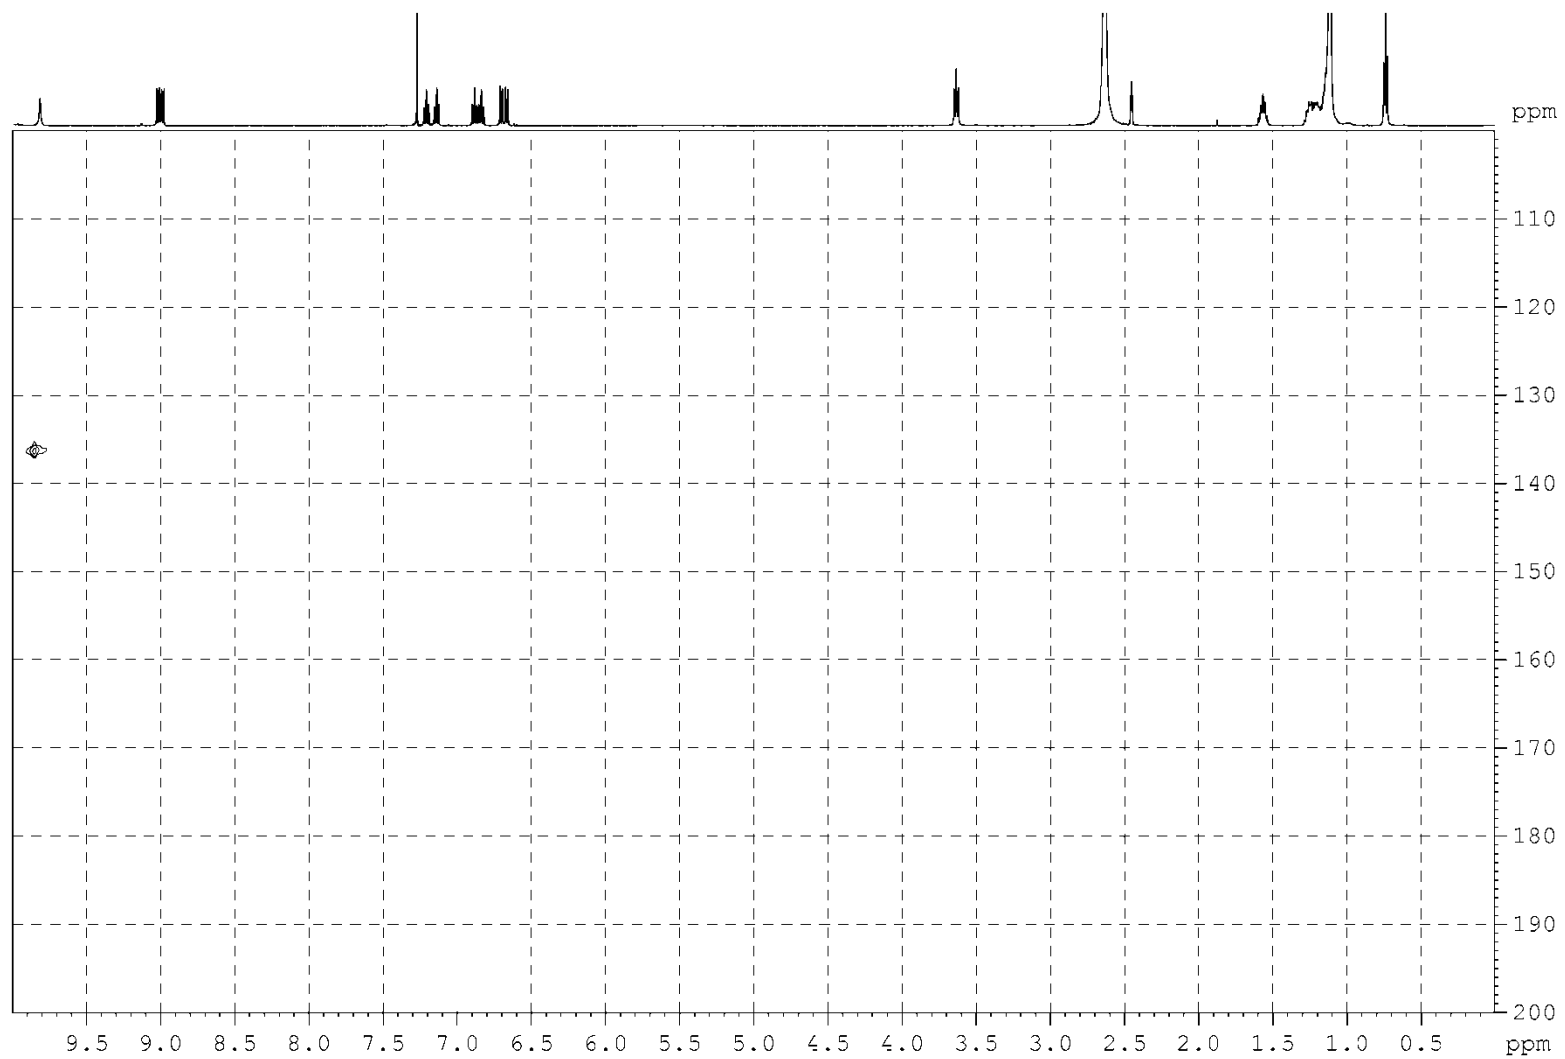

**Figure S30:** 2D  $^1\text{H}$ ,  $^{15}\text{N}$  HSQC NMR spectra of **3**.



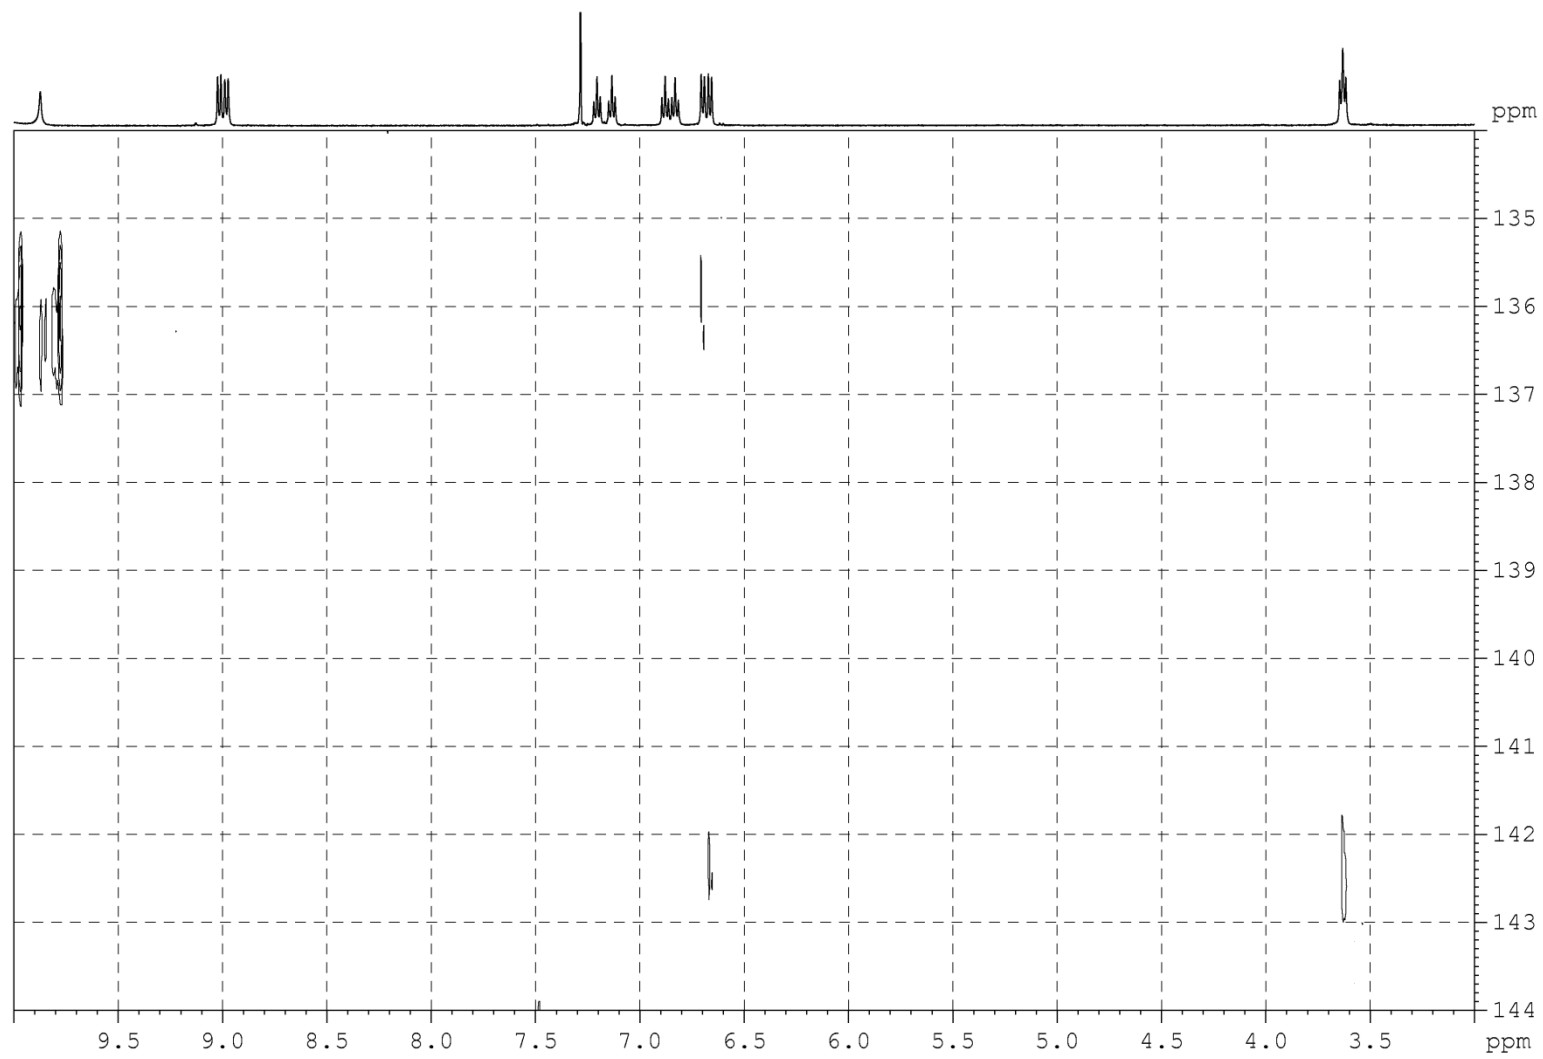

**Figure S31:** 2D  $^1\text{H}$ ,  $^{15}\text{N}$  HMBC NMR spectra of **3**.

**Table S6:** Calculated (B3LYP/6-31G(d)//B3LYP/6-31G(d)) for **3'** and experimental for **3**  $^{13}\text{C}$  and  $^{15}\text{N}$  (in  $\text{CDCl}_3/\text{DMSO}-d_6$  (9:1)) CSs.

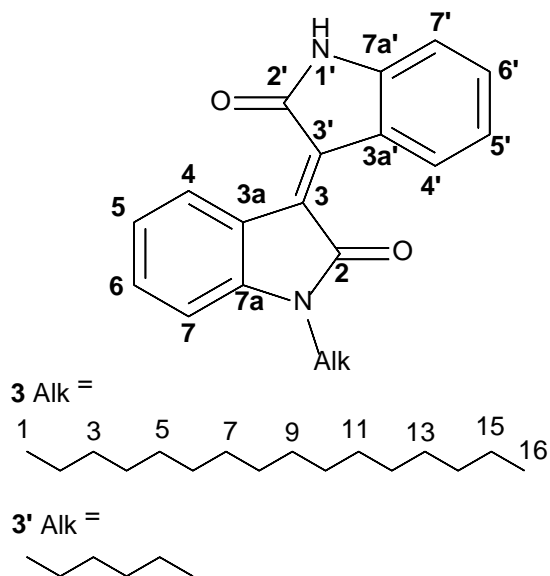

| NUCL    | GIAO CS, ppm | Expt, CS, ppm |
|---------|--------------|---------------|
| C5      | 116.8353     | 121.64        |
| C6      | 127.4504     | 131.76        |
| C7      | 101.9643     | 107.5         |
| C7a     | 139.4555     | 144.22        |
| C3a     | 118.3801     | 121.32        |
| C4      | 128.0972     | 129.3         |
| C2      | 161.3018     | 167.5         |
| C3      | 132.0753     | 132.62        |
| C1-Alk  | 42.186       | 39.66         |
| C5'     | 116.7246     | 121.3         |
| C6'     | 127.14       | 132.12        |
| C7'     | 102.571      | 109.3         |
| C7a'    | 136.6343     | 143.67        |
| C3a'    | 119.1201     | 121.99        |
| C4'     | 128.1603     | 129.47        |
| C2'     | 160.659      | 169.34        |
| C3'     | 131.0128     | 134.11        |
| C2-Alk  | 31.2391      | 27.08         |
| C3-Alk  | 31.483       | 26.63         |
| C14-Alk | 35.5828      | 31.49         |
| C15-Alk | 27.6541      | 22.25         |
| C16-Alk | 17.5101      | 13.73         |
| N1      | 158.3325     | 142.5         |
| N1'     | 145.4893     | 136.2         |

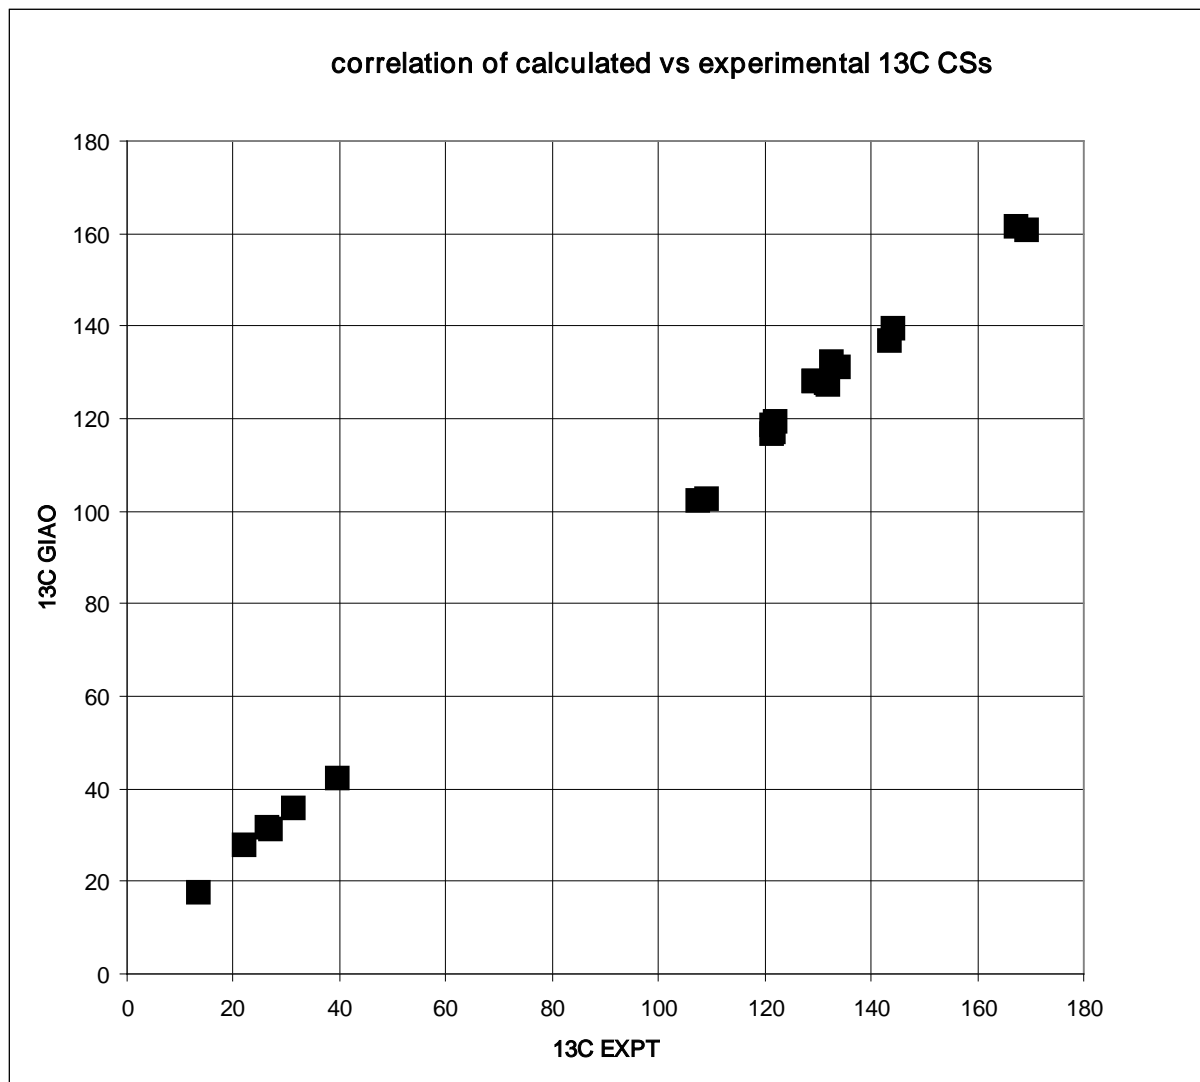

**Figure S32:** Correlations of calculated (B3LYP/6-31G(d)//B3LYP/6-31G(d), for **3'**) versus experimental  $^{13}\text{C}$  chemical shifts for **3**.

## References

1. Cambridge structural database system. Version 1.17 Cambridge Crystallographic Data Centre, 2014.
2. Yu.K. Voronina, D.B. Krivolapov, A.V. Bogdanov, V.F. Mironov, I.A. Litvinov, An unusual conformation of 1,1'-Dimethyl-Isoindigo in crystals. *J. Str. Chem.*, 53(2) (2012) 413-416.
3. W. Yue, T. He, M. Stolte, M. Gsänger, F. Würthner, Cyanated isoindigos for n-type and ambipolar organic thin film transistors, *Chem. Commun.*, 50 (2014) 545-547.
4. A.V. Bogdanov, T.N. Pashirova, L.I. Musin, D.B. Krivolapov, L.Ya. Zakharova, V.F. Mironov, A.I. Konovalov, Novel isoindigo derivatives bearing long-chain N-alkyl substituents: synthesis and self-assemble behavior, *Chem. Phys. Lett.*, 594 (2014) 69–73.
5. J. Mata, D. Varade, P. Bahadur, Aggregation behavior of quaternary salt based cationic surfactants, *Thermochimica Acta* 428 (2005) 147-155.
6. J.R. McElhanon, T. Zifer, S.R. Kline, D.R. Wheeler, D.A. Loy, G.M. Jamison, T.M. Long, K. Rahimian, B.A. Simmons, Thermally cleavable surfactants based on furan-maleimide Diels – Alder adducts, *Langmuir* 21 (8) (2005) 3259-3266.
